# Supplementary material
Source: PubMed Central journal article supplement (PMC7380930)

Supplementary Figure S1. Flowchart of symptom management

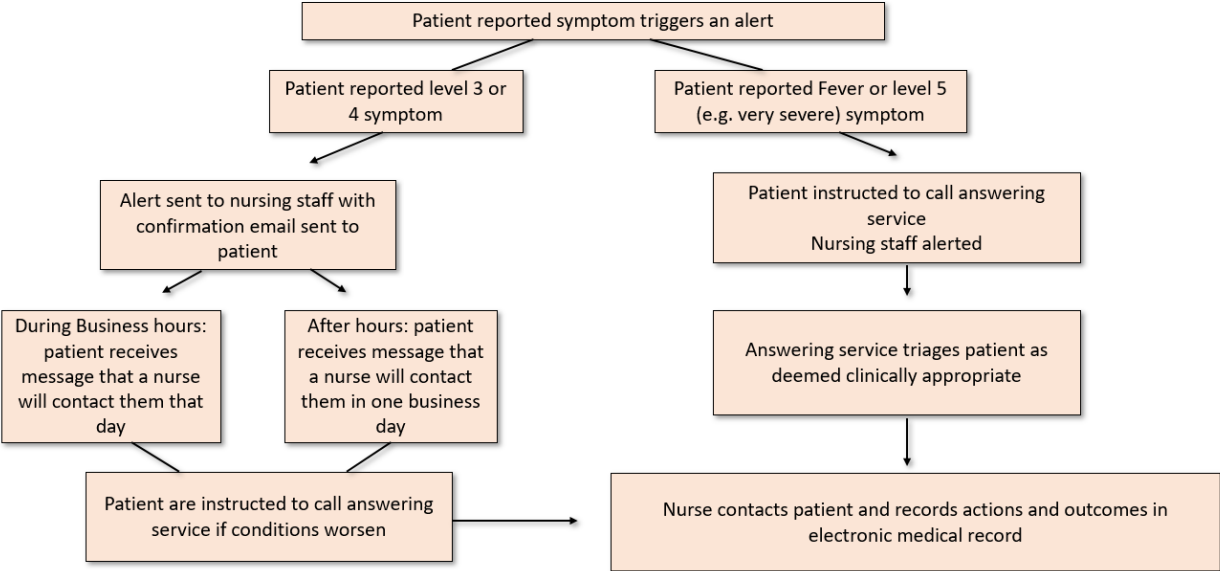

Supplement: mmc1.pdf [file mmc1.pdf]
